# Supplementary material for: A High-Throughput Screen against Pantothenate Synthetase (PanC) Identifies 3-Biphenyl-4-Cyanopyrrole-2-Carboxylic Acids as a New Class of Inhibitor with Activity against Mycobacterium tuberculosis
Source: PubMed Central journal article supplement (PMC3820577; doi:10.1371/journal.pone.0072786), 2013-11-07
Supplement: pone.0072786.s004.pdf [file pone.0072786.s004.pdf]

# Supporting Figure S3

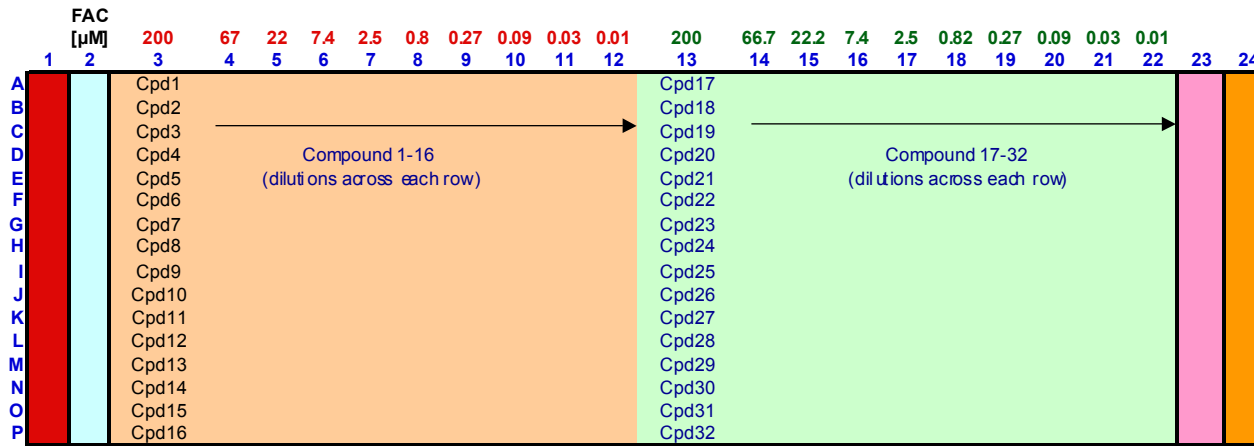

**PosCtrl-Max NafOx** = 750 uM NafOx  
**PosCtrl-Mid NafOx** = 250 uM NafOx  
**PosCtrl-substrate** = 0 uM  
**NegCtrl-Min NoCmpc** = 0 uM pantoate  
**Samples** compound dilutions
