# Supplementary material for: A High-Throughput Screen against Pantothenate Synthetase (PanC) Identifies 3-Biphenyl-4-Cyanopyrrole-2-Carboxylic Acids as a New Class of Inhibitor with Activity against Mycobacterium tuberculosis
Source: PubMed Central journal article supplement (PMC3820577; doi:10.1371/journal.pone.0072786), 2013-11-07

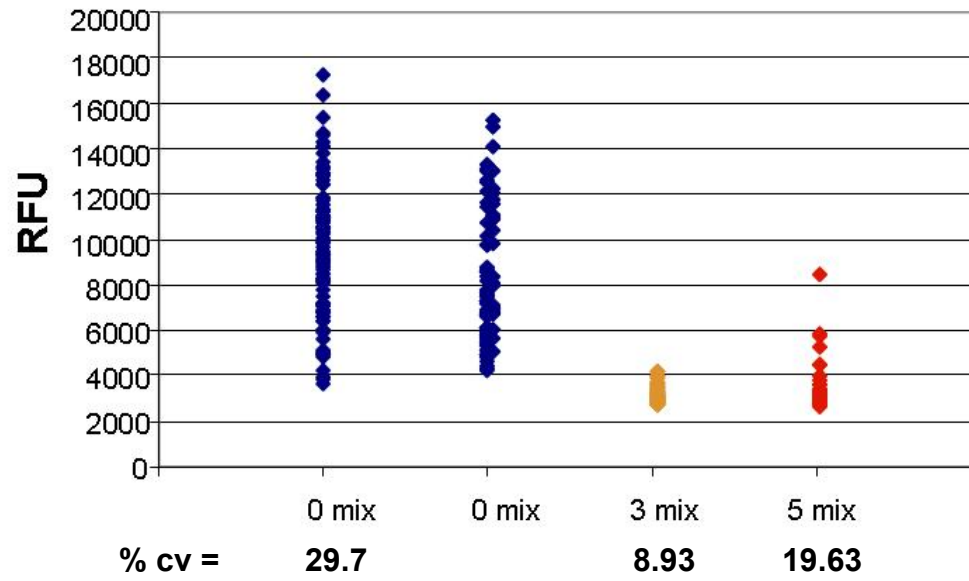

Supplement: pone.0072786.s005.pdf [file pone.0072786.s005.pdf]
